# Supplementary material for: Rapid, facile synthesis of InSb twinning superlattice nanowires with a high-frequency photoconductivity response
Source: Royal Society of Chemistry journal article supplement (doi:10.1039/d1ra01903a), 2021-01-01
Supplement: d1ra01903a1.pdf [file d1ra01903a1.pdf]

## Electronic Supporting Information

### Rapid, facile synthesis of InSb twinning superlattice nanowires with high-frequency photoconductivity response

Yinyin Qian,<sup>†,\*a</sup> Kaijia Xu,<sup>†a</sup> Lanjun Cheng,<sup>b</sup> Cunxin Li,<sup>a</sup> and Xingchen Wang<sup>a</sup>

\*Corresponding authors

<sup>a</sup>Anhui Laboratory of Clean Energy Materials and Chemistry for Sustainable Conversion of Natural Resources, College of Chemical and Environmental Engineering, Anhui Polytechnic University, Wuhu 241000, P.R. China, E-mail: qianyinyin@ahpu.edu.cn.

<sup>b</sup>University of Science and Technology of China, Hefei 230026, P.R. China

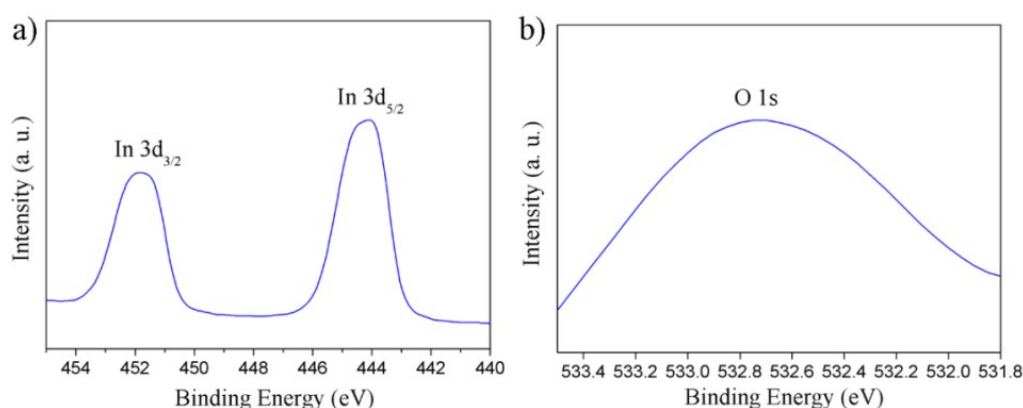

**Figure S1.** XPS spectra of the as-synthesized InSb nanowires. a) The In 3d core-level spectrum. b) The O 1s spectrum of the as-synthesized InSb nanowires.

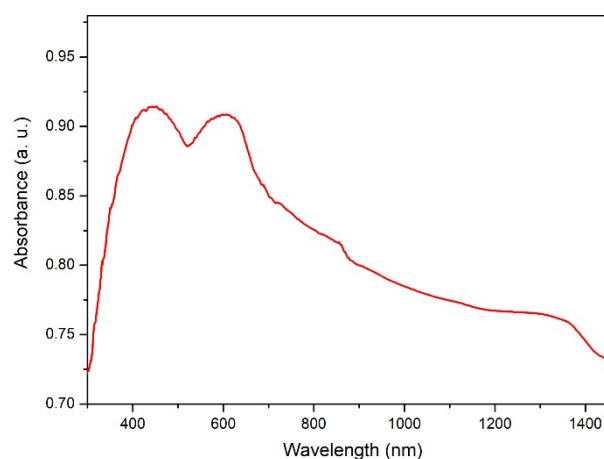

**Figure S2.** The room temperature UV-vis-NIR absorption spectra spectra of InSb twinning superlattice nanowires.

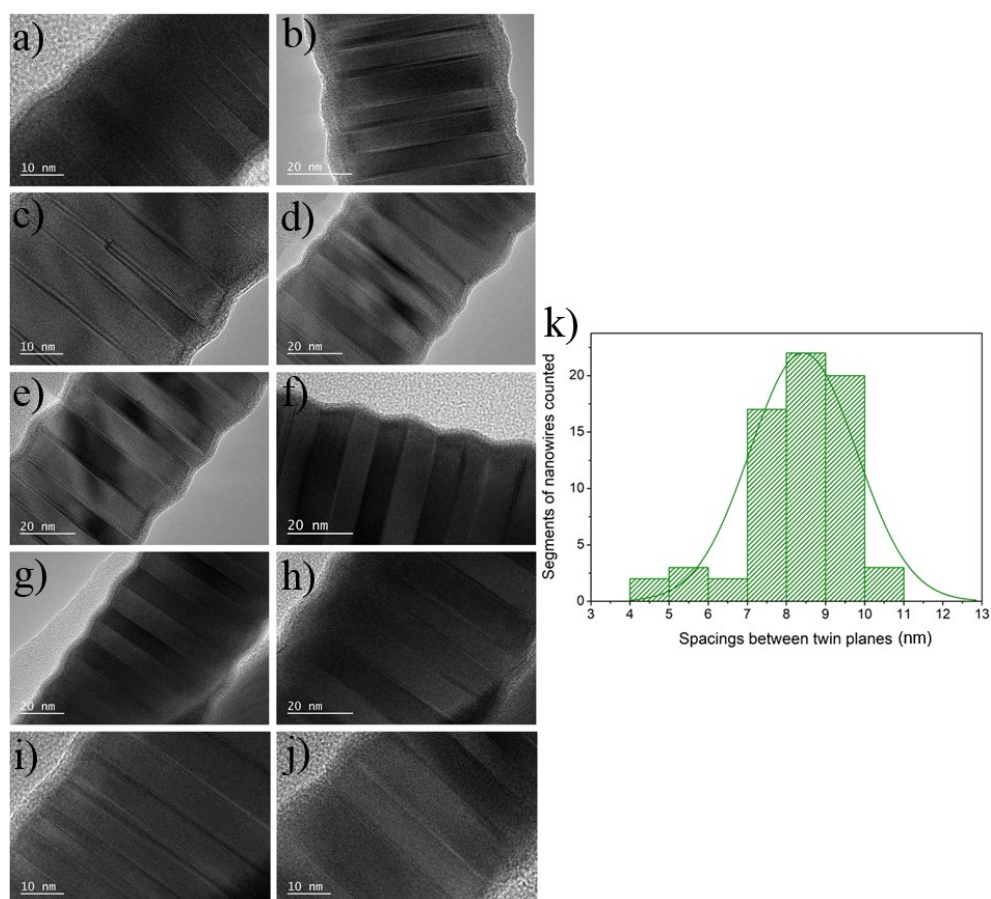

**Figure S3.** (a-j) TEM images for the as-prepared InSb twinning superlattice nanowires, and (k) the spacings between two consecutive twin planes for the InSb nanowires data are indicated in the histogram. The solid line shows a Gaussian fit of the spacings between twin planes distribution.

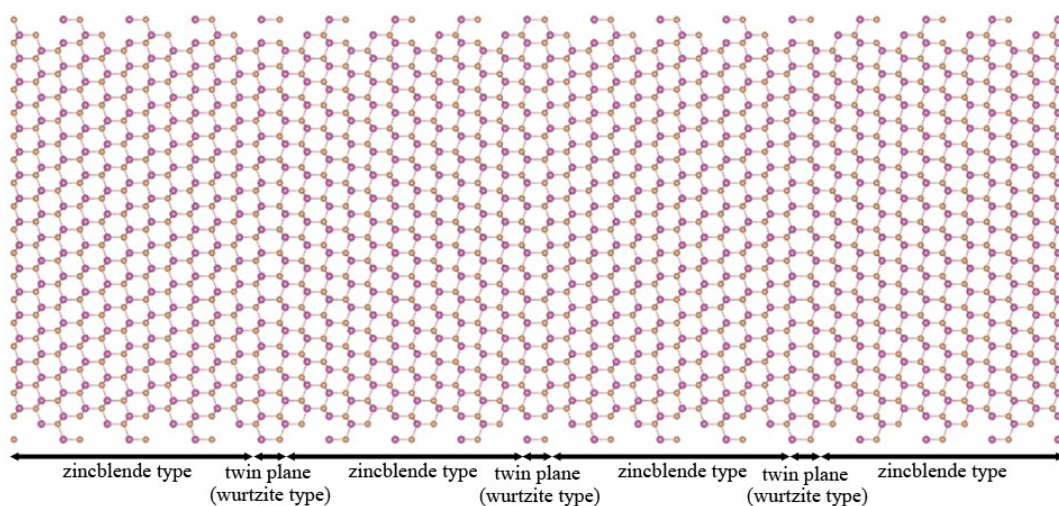

**Figure S4.** Atomic model for the periodic growth of the InSb nanowire with twinning superlattices, the purple and orange balls represent antimony and indium atoms.

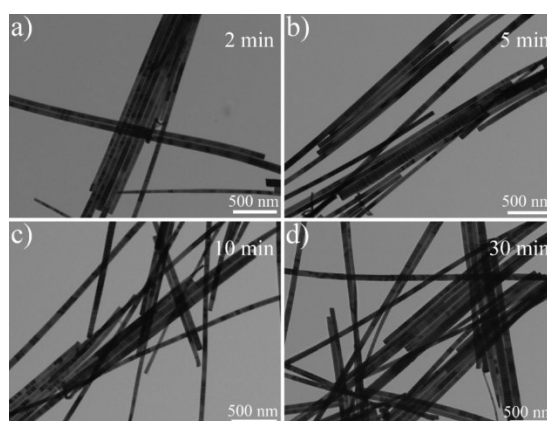

**Figure S5.** TEM images of InSb NWs with reaction times of 2 min, 5 min, 10 min, 30 min detected at room temperatures were shown.

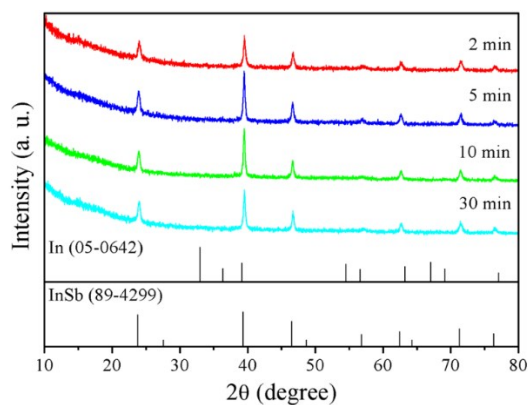

**Figure S6.** XRD patterns of the as-synthesized InSb nanowires with reaction times of 2 min, 5 min, 10 min, 30 min.

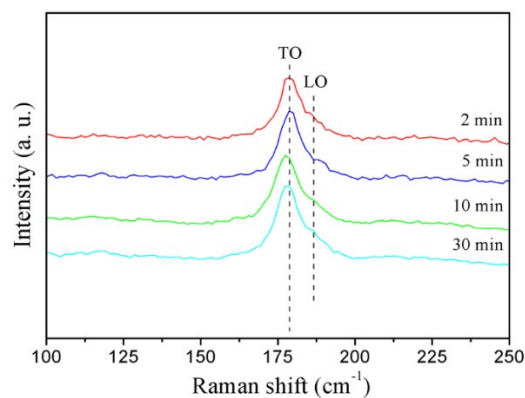

**Figure S7.** Raman spectra of the as-synthesized InSb nanowires with reaction times of 2 min, 5 min, 10 min, 30 min detected at room temperature detected at room temperatures were shown.

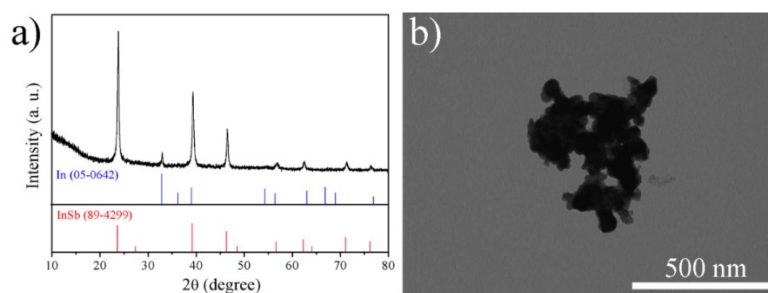

**Figure S8.** (a) XRD pattern, and (b) TEM image for the InSb nanocrystals prepared at about 175 °C for 60 s at the absence of TOP.

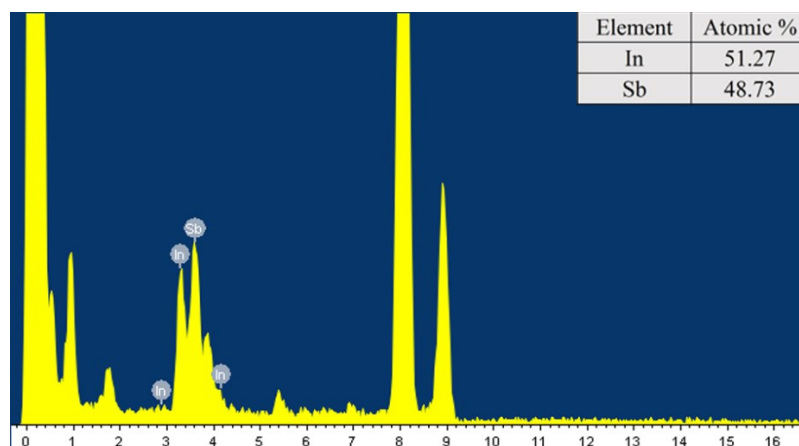

**Figure S9.** STEM-EDX spectra of a typical InSb nanowire stem. The signal of Cu and C arises from the TEM grid made of Cu.

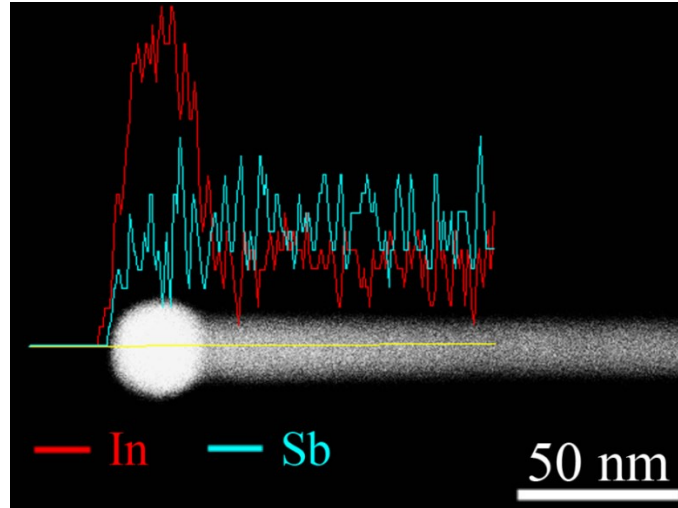

**Figure S10.** STEM-EDX line scan of a single InSb nanowire from the In tip. Red and light blue lines represent In and Sb elements, respectively.

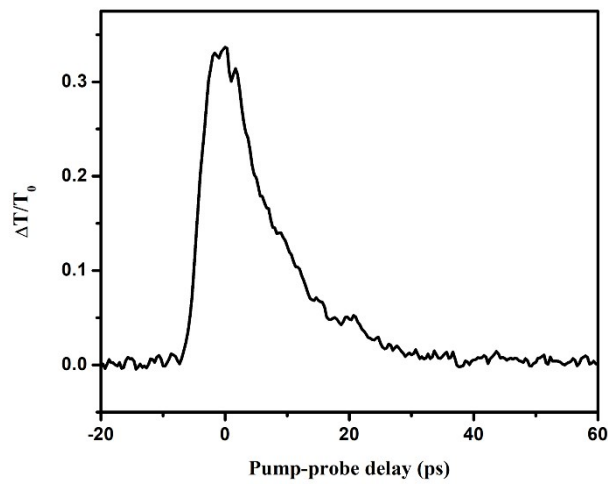

**Figure S11.** Pump-induced change in peak transmitted terahertz electric field ( $\Delta T/T_0$ ) for different pump-probe delays for InSb nanowires excited at 800 nm with an incident pump fluence of 50 mJ/cm<sup>2</sup>.
